# Supplementary material for: Effects of alkyl or alkoxy side chains on the electrochromic properties of four ambipolar donor–acceptor type polymers
Source: Royal Society of Chemistry journal article supplement (doi:10.1039/c4ra08664c), 2014-01-01
Supplement: c4ra08664c1.pdf [file c4ra08664c1.pdf]

### Supporting Information

## **Effects of Alkyl or Alkoxy Side Chains on the Electrochromic Properties of Four Ambipolar Donor-Acceptor Type Polymers**

Yanxia Liu, Min Wang, Jinsheng Zhao\*, Chuansheng Cui and Jifeng Liu\*

Shandong Key laboratory of Chemical Energy Storage and Novel Cell  
Technology, Liaocheng University, Liaocheng, 252059, P.R. China

Correspondence to: Jinsheng Zhao (E-mail: [j.s.zhao@163.com](mailto:j.s.zhao@163.com)); Jifeng Liu (E-mail: [liujifeng1971@163.com](mailto:liujifeng1971@163.com))

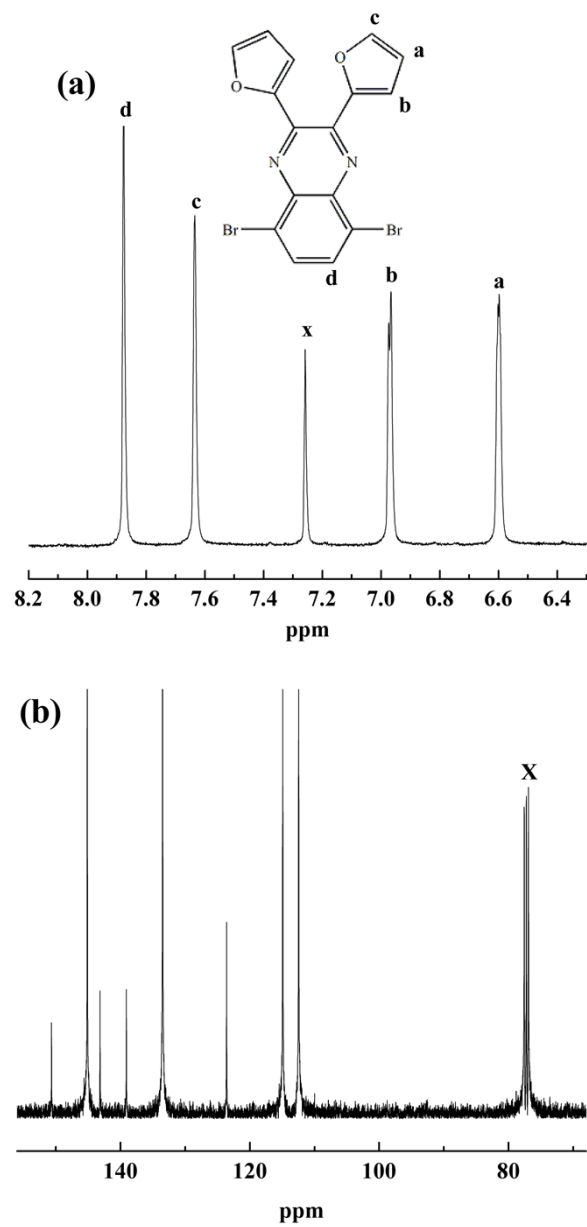

**Fig. S1†** (a) <sup>1</sup>H NMR spectrum of 2,3-bis(2-furyl)-5,8-dibromoquinoxaline in CDCl<sub>3</sub>. Solvent peak at  $\delta = 7.26$  ppm is marked by 'x'. (b) <sup>13</sup>C NMR spectrum of 2,3-bis(2-furyl)-5,8-dibromoquinoxaline in CDCl<sub>3</sub>. Solvent peak at  $\delta = 77.3$  ppm is marked by 'x'.

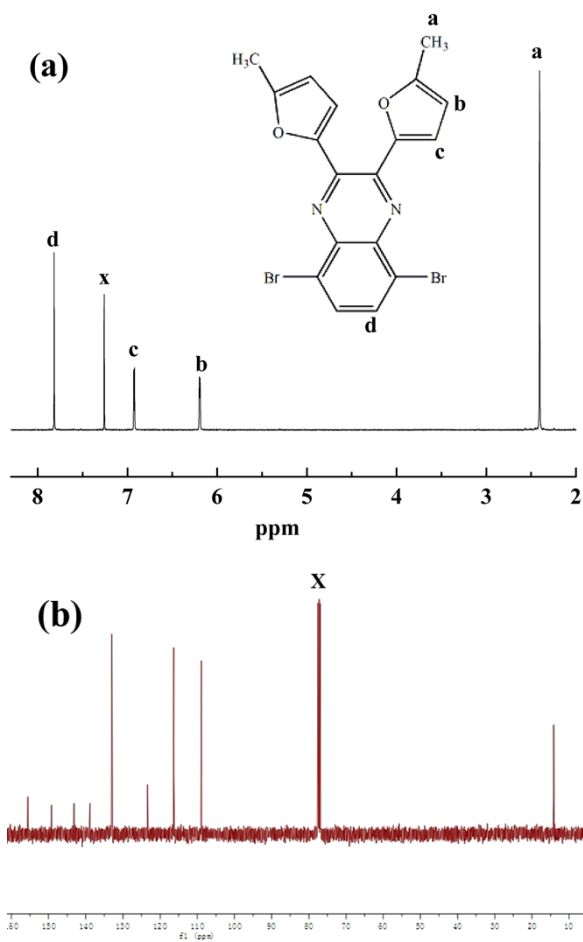

**Fig. S2†** (a) <sup>1</sup>H NMR spectrum of 2,3-bis(5-methylfuran-2-yl)-5,8-dibromoquinoxaline in CDCl<sub>3</sub>. Solvent peak at  $\delta = 7.26$  ppm is marked by 'x'. (b) <sup>13</sup>C NMR spectrum of 2,3-bis(5-methylfuran-2-yl)-5,8-dibromoquinoxaline in CDCl<sub>3</sub>. Solvent peak at  $\delta = 77.3$  ppm is marked by 'x'.

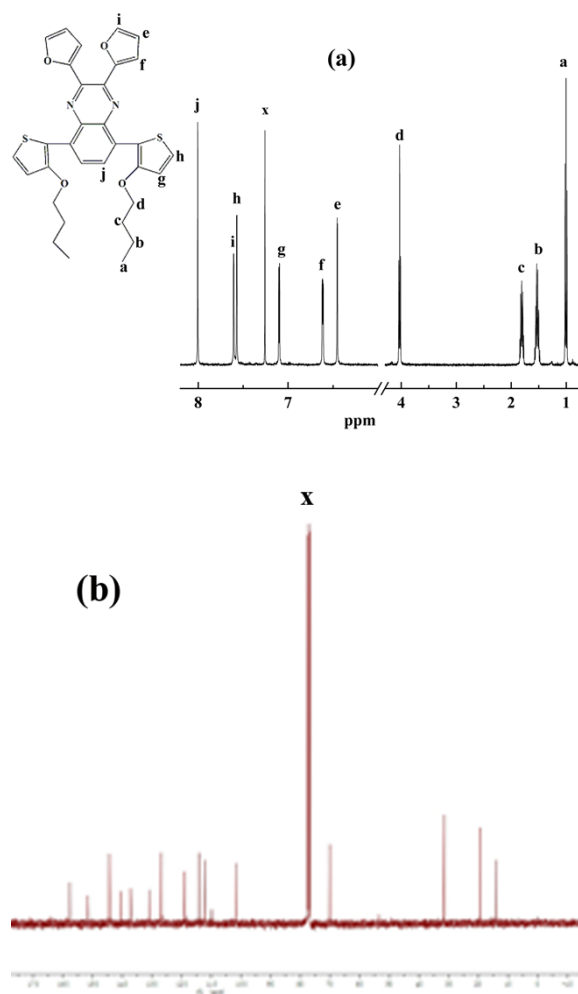

**Fig. S3†** (a)  $^1\text{H}$  NMR spectrum of 2,3-di(2-furyl)-5,8-bis(2-(3-butoxythiophene)) quinoxaline (FBOTQ) monomer in  $\text{CDCl}_3$ . Solvent peak at  $\delta = 7.26$  ppm is marked by 'x'. (b)  $^{13}\text{C}$  NMR spectrum of 2,3-di(2-furyl)-5,8-bis(2-(3-butoxythiophene)) quinoxaline (FBOTQ) monomer in  $\text{CDCl}_3$ . Solvent peak at  $\delta = 77.3$  ppm is marked by 'x'.

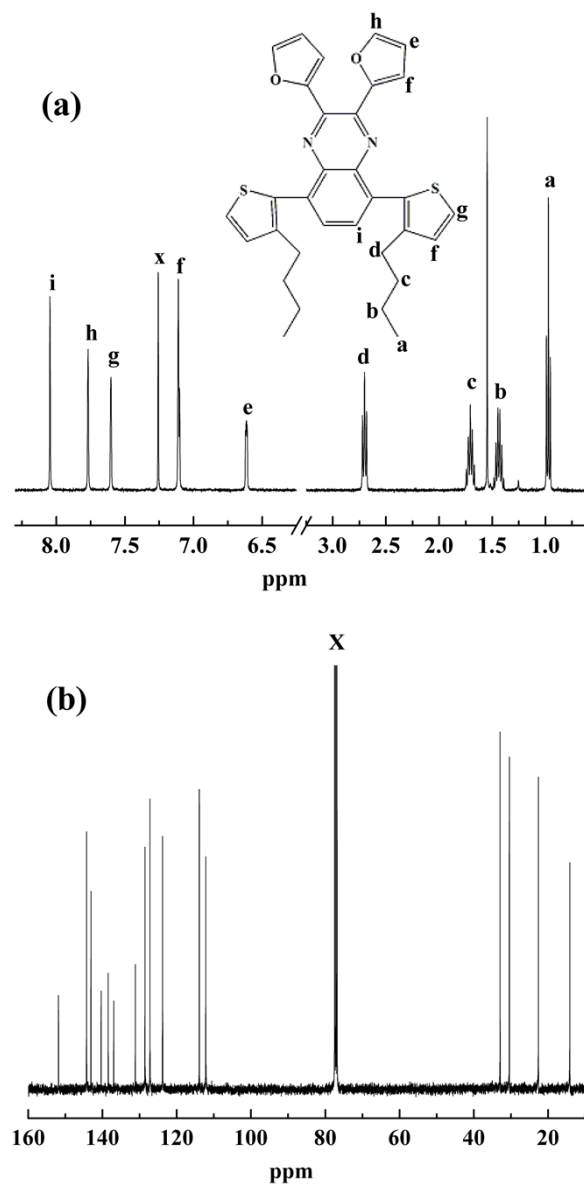

**Fig. S4†** (a)  $^1\text{H}$  NMR spectrum of 2,3-di(2-furyl)-5,8-bis(2-(3-butylthiophene)) quinoxaline (FBTQ) monomer in  $\text{CDCl}_3$ . Solvent peak at  $\delta = 7.26$  ppm is marked by 'x'. (b)  $^{13}\text{C}$  NMR spectrum of 2,3-di(2-furyl)-5,8-bis(2-(3-butylthiophene)) quinoxaline (FBTQ) monomer in  $\text{CDCl}_3$ . Solvent peak at  $\delta = 77.3$  ppm is marked by 'x'.

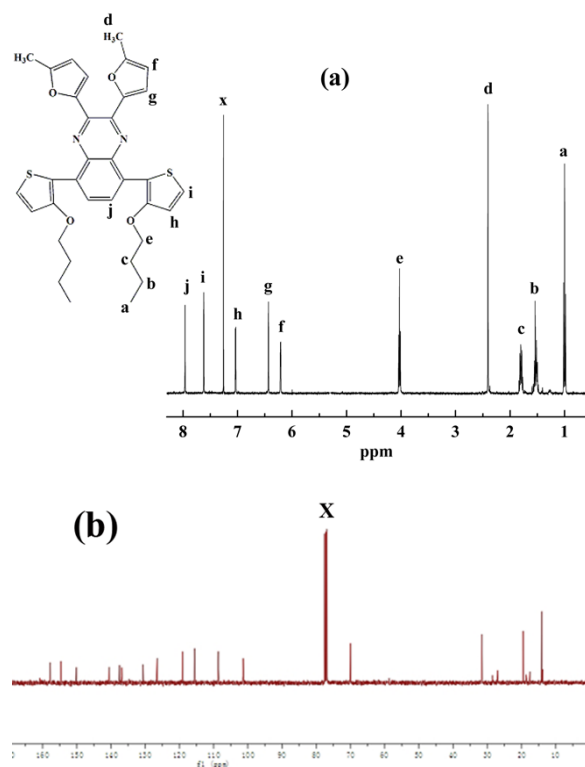

**Fig. S5†** (a) <sup>1</sup>H NMR spectrum of 2,3-di(5-methylfuran-2-yl)-5,8-bis(2-(3-butoxythiophene)) quinoxaline (MFBOTQ) monomer in CDCl<sub>3</sub>. Solvent peak at  $\delta = 7.26$  ppm is marked by 'x'. (b) <sup>13</sup>C NMR spectrum of 2,3-di(5-methylfuran-2-yl)-5,8-bis(2-(3-butoxythiophene)) quinoxaline (MFBOTQ) monomer in CDCl<sub>3</sub>. Solvent peak at  $\delta = 77.3$  ppm ppm is marked by 'x'.

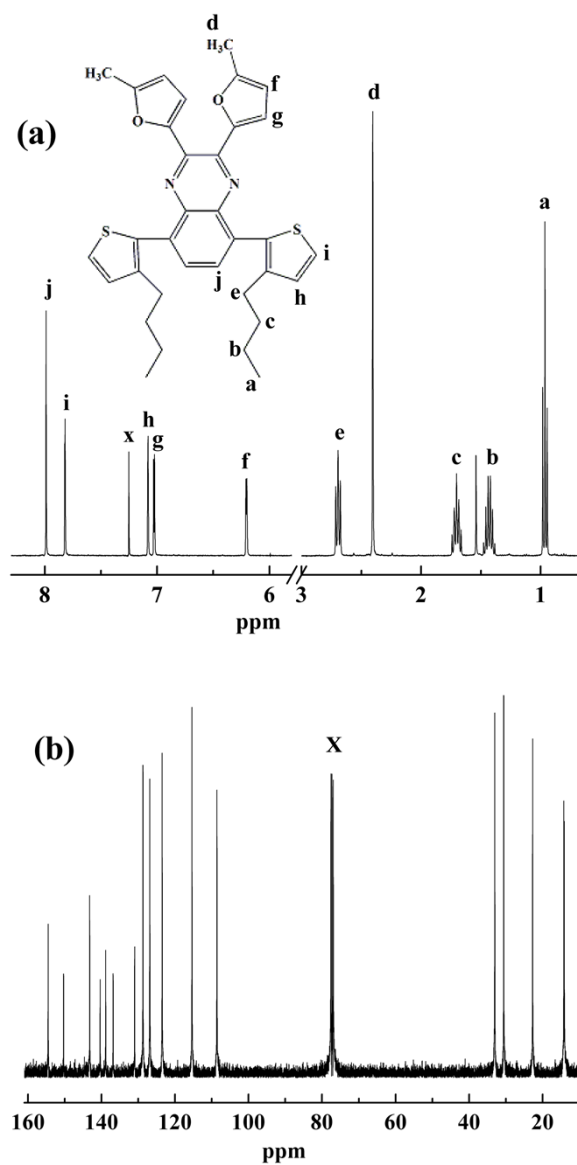

**Fig. S6†** (a)  $^1\text{H}$  NMR spectrum of 2,3-di(5-methylfuran-2-yl)-5,8-bis(2-(3-butylthiophene)) quinoxaline (MFBTQ) monomer in  $\text{CDCl}_3$ . Solvent peak at  $\delta = 7.26$  ppm is marked by 'x'. (b)  $^{13}\text{C}$  NMR spectrum of 2,3-di(5-methylfuran-2-yl)-5,8-bis(2-(3-butylthiophene)) quinoxaline (MFBTQ) monomer in  $\text{CDCl}_3$ . Solvent peak at  $\delta = 77.3$  ppm is marked by 'x'.

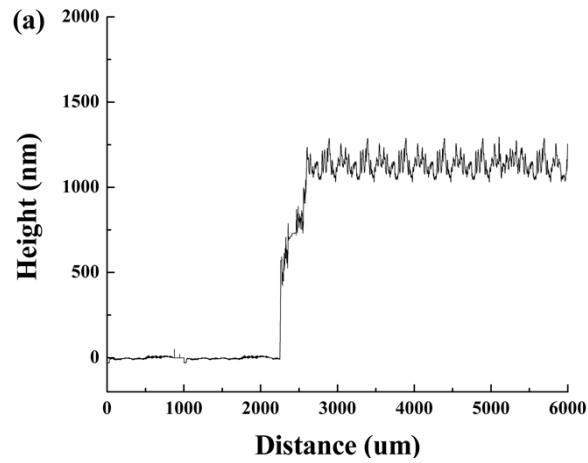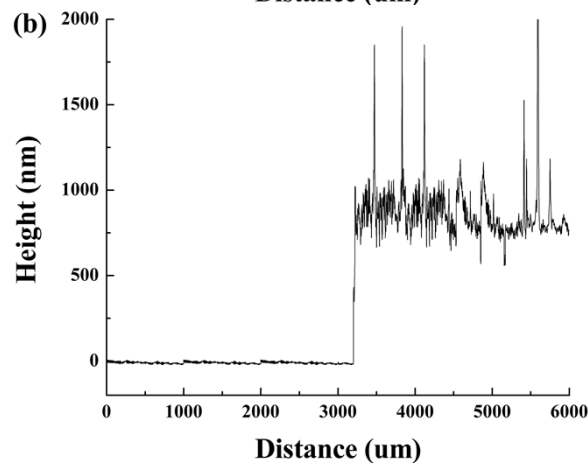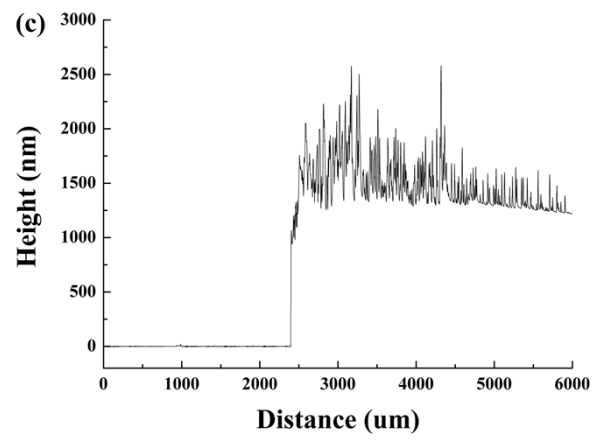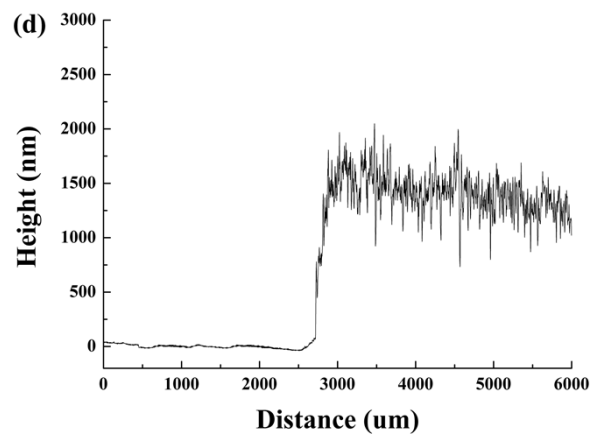



**Fig. S7†** Thicknesses of the PFBOTQ (a), PMFBOTQ (b), PFBTQ (c) and PMFBTQ (d) films deposited potentiostatically onto ITO electrode.
